# Supplementary material for: Mulberry (Fructus mori) extract alleviates hyperuricemia by regulating urate transporters and modulating the gut microbiota
Source: Royal Society of Chemistry journal article supplement (doi:10.1039/d4fo03481c), 2024-01-01
Supplement: d4fo03481c1.pdf [file d4fo03481c1.pdf]

## **1.Preparation method**

Weigh 1 g of the freeze-dried powder of mulberry prepared in the laboratory, add 5 mL of 50% (V/V) methanol-water solution, and place the supernatant in a high-speed centrifuge at 13,000 r/min for 10 minutes to obtain the mulberry extract. The same operation steps are used to obtain the blank control sample.

## **2.Instrument parameter**

### **2.1 Chromatographic condition**

The sample obtained by the above method is filtered using an SPFE filter (waters); then 4  $\mu$ L is injected into the HPLC, and qualitative and quantitative UHPLC-MS analysis of the extract is performed using the UltiMate 3000 UHPLC (Thermo Fisher Scientific, USA) system. This system is equipped with a 2.1 mm  $\times$  100 mm, 1.8  $\mu$ m, C-18 column, with a column temperature of 45  $^{\circ}$ C. A linear gradient solvent system of acetonitrile (solvent A) and 0.1% (V/V) formic acid in aqueous solution (solvent B) is used as follows: 5% solution A, 0-1 min; 5%-95% solution A, 1-30 min; 95% solution A, 30-32 min; 95%-5% solution A, 32-32.10 min; 5% solution A, 32.10-35 min. The monitoring wavelength range is 210-800 nm.

### **2.2Mass spectrum condition**

The mass spectrometer used in this study is the LTQ ORBITRAP VELOS PRO (Thermo Fisher Scientific, USA), operating under chromatographic conditions as previously described. In positive ion mode, the HESI source operates with an ion source temperature of 350  $^{\circ}$ C, a capillary temperature of 320  $^{\circ}$ C, a sheath gas flow rate of 35 units, an auxiliary gas flow rate of 10 units, a spray voltage of 4 kV, a capillary voltage of 35 V, and a tube lens voltage of 110 V. Samples undergo an initial full scan with a resolution set at 30,000 and a scan range of 50-900 m/z. Secondary scans utilize dynamic data-dependent scanning (DDS), selecting the top three most abundant peaks from the previous stage for collision-induced dissociation (CID) fragment scanning, detected with a dynode in the ion trap. In negative ion mode, the ion source temperature is 300  $^{\circ}$ C, the capillary temperature is 320 $^{\circ}$ C, the sheath gas flow rate is 35 units, the auxiliary gas flow rate is 10 units, the spray voltage is 3.6kV, and the capillary voltage is 35V, with the tube lens voltage at 110V, while the other parameters remain the same as in positive ion mode.

| No. | Name                                                                                               | Adduct | m/z (Apex) | m/z (Delta(ppm)) | Measured Area | Left RT  |
|-----|----------------------------------------------------------------------------------------------------|--------|------------|------------------|---------------|----------|
| 1   | Epicatechin                                                                                        | M+H    | 212.05505  | -1.39723         | 6950665.377   | 1.335738 |
| 2   | Pyroglutamic acid                                                                                  | M+H    | 130.05     | -2.0275          | 4710981.778   | 1.381    |
| 3   | 2-formyl-1h-pyrrolole-1-butyric acid                                                               | M+H    | 126.055    | -1.85913         | 4584789.053   | 1.3242   |
| 4   | 2 $\alpha$ , 3 $\beta$ -dihydroxynorepinephrine                                                    | M+H    | 182.081    | -1.30372         | 4542174.946   | 1.4803   |
| 5   | Protocatechuic acid                                                                                | M-H    | 153.0199   | 3.708            | 2967111.19    | 2.8399   |
| 6   | arabinose                                                                                          | M-H    | 109.03     | 3.945            | 2346913.537   | 2.8399   |
| 7   | 2- (5-hydroxymethyl-2-formylpyrrole-1-yl) propionic acid                                           | M+H    | 180.065    | -0.92525         | 1852241.853   | 1.699    |
| 8   | morin                                                                                              | M-H    | 301.0358   | 1.386            | 1552914.336   | 10.504   |
| 9   | Quercetin                                                                                          | M-H    | 301.0358   | 1.386            | 1552914.336   | 10.504   |
| 10  | Ethyl pyroglutamic acid                                                                            | M+H    | 158.081    | -1.11555         | 1370277.429   | 2.5534   |
| 11  | 2 $\beta$ , 3 $\beta$ -dihydroxynorepinephrine                                                     | M+H    | 144.102    | -1.03493         | 1024135.191   | 1.347    |
| 12  | 2- (5-hydroxymethyl-2-methylpyrrole-1-yl) propionic acid lactone                                   | M+H    | 144.102    | -1.03493         | 1024135.191   | 1.347    |
| 13  | glucose                                                                                            | M-H    | 179.057    | 3.39             | 937009.4046   | 0.914    |
| 14  | Astragaloside IV                                                                                   | M-H    | 179.057    | 3.39             | 937009.4046   | 0.914    |
| 15  | P-hydroxybenzoic acid                                                                              | M+H    | 139.039    | -1.09063         | 893790.232    | 1.5635   |
| 16  | Ethyl caffeic acid                                                                                 | M+H    | 209.081    | -1.01663         | 666091.2502   | 6.8238   |
| 17  | 2-[2-formyl-5 (-methoxy methyl) -1H-pyrrolo-1-yl]-3- (4-hydroxyphenyl) propionic acid methyl ester | M+H    | 198.076    | -1.23093         | 516201.1351   | 1.1293   |
| 18  | Methyl ester of 3-caffeoyl quinic acid                                                             | M+H    | 369.1174   | -1.64955         | 437430.7241   | 7.4713   |
| 19  | Quercetin 3-O-galactoside                                                                          | M+H    | 369.1174   | -1.64955         | 437430.7241   | 7.4713   |
| 20  | scopoletin                                                                                         | M+H    | 193.049    | -0.68397         | 361649.5549   | 9.9453   |
| 21  | Aesculin                                                                                           | M+H    | 179.034    | -1.87631         | 289288.0591   | 1.7654   |
| 22  | Catechol                                                                                           | M+H    | 179.034    | -1.87631         | 289288.0591   | 1.7654   |
| 23  | Dihydroquercetin                                                                                   | M-H    | 303.052    | 2.301            | 267274.8556   | 7.7148   |
| 24  | Caffeoyl quinic acid                                                                               | M+H    | 355.102    | -2.07395         | 249959.0449   | 6.6723   |
| 25  | Chlorogenic acid                                                                                   | M+H    | 355.102    | -2.07395         | 249959.0449   | 6.6723   |
| 26  | Cryptochlorogenic acid                                                                             | M+H    | 355.102    | -2.07395         | 249959.0449   | 6.6723   |
| 27  | Resveratrol glycosides                                                                             | M+H    | 355.102    | -2.07395         | 249959.0449   | 6.6723   |
| 28  | Myricetin                                                                                          | M+H    | 319.044    | -1.46513         | 234391.1371   | 9.1317   |
| 29  | Astragaloside                                                                                      | M-H    | 447.094    | 1.939            | 232758.5726   | 9.4846   |
| 30  | Kaempferol 3-O-rutin                                                                               | M-H    | 447.094    | 1.939            | 232758.5726   | 9.4846   |
| 31  | Devasculin-3-glucoside                                                                             | M-H    | 447.094    | 1.939            | 232758.5726   | 9.4846   |

|    |                                                  |     |          |          |             |         |
|----|--------------------------------------------------|-----|----------|----------|-------------|---------|
| 32 | 5-(hydroxymethyl) -1H-pyrrole-2-<br>formaldehyde | M-H | 447.094  | 1.939    | 232758.5726 | 9.4846  |
| 33 | Anthocyanins                                     | M+H | 305.101  | -1.90299 | 110280.7613 | 12.658  |
| 34 | Epigallocatechin                                 | M+H | 291.086  | 0.607    | 95307.367   | 10.4777 |
| 35 | Isoquercetin                                     | M-H | 463.089  | 0.979    | 89105.35    | 7.7148  |
| 36 | Isoquercitrin                                    | M-H | 463.089  | 0.979    | 89105.35    | 7.7148  |
| 37 | Naringin                                         | M-H | 463.089  | 0.979    | 89105.35    | 7.7148  |
| 38 | Kaempferol-3-O- $\beta$ -D-glucopyranoside       | M-H | 319.047  | 2.165    | 81133.801   | 5.9919  |
| 39 | 5, 7-dihydroxychromogenone                       | M-H | 389.125  | 1.846    | 60787.566   | 7.8139  |
| 40 | Caffeic acid                                     | M-H | 179.0354 | 2.348    | 56059.463   | 1.6712  |

---
